# Supplementary material for: Green-and-red photoluminescence from Si–Si and Ge–Ge bonded network homopolymers and copolymers
Source: Royal Society of Chemistry journal article supplement (doi:10.1039/c0py00345j), 2011-01-01
Supplement: c0py00345j.pdf [file c0py00345j.pdf]

## Green-and-Red Photoluminescence from Si–Si and Ge–Ge Bonded Network Homopolymers and Copolymers

Michiya Fujiki,<sup>a\*</sup> Masahiko Kato,<sup>a</sup> Yoshiki Kawamoto<sup>a</sup> and Giseop Kwak<sup>b\*</sup>

5

<sup>a</sup> Graduate School of Materials Science, Nara Institute of Science and Technology, 8916-5 Takayama, Ikoma, Nara 630-0036, Japan. Fax: 81-743-72-6049; Tel: 81-743-72-6040; E-mail: fujikim@ms.naist.jp

<sup>b</sup> Department of Polymer Science, Kyungpook National University, 1370 Sankyuk-dong, Buk-gu, Daegu 702-701, Korea. Fax: 82-53-950-6623; Tel: 82-53-9507758; E-mail: gkwak@knu.ac.kr

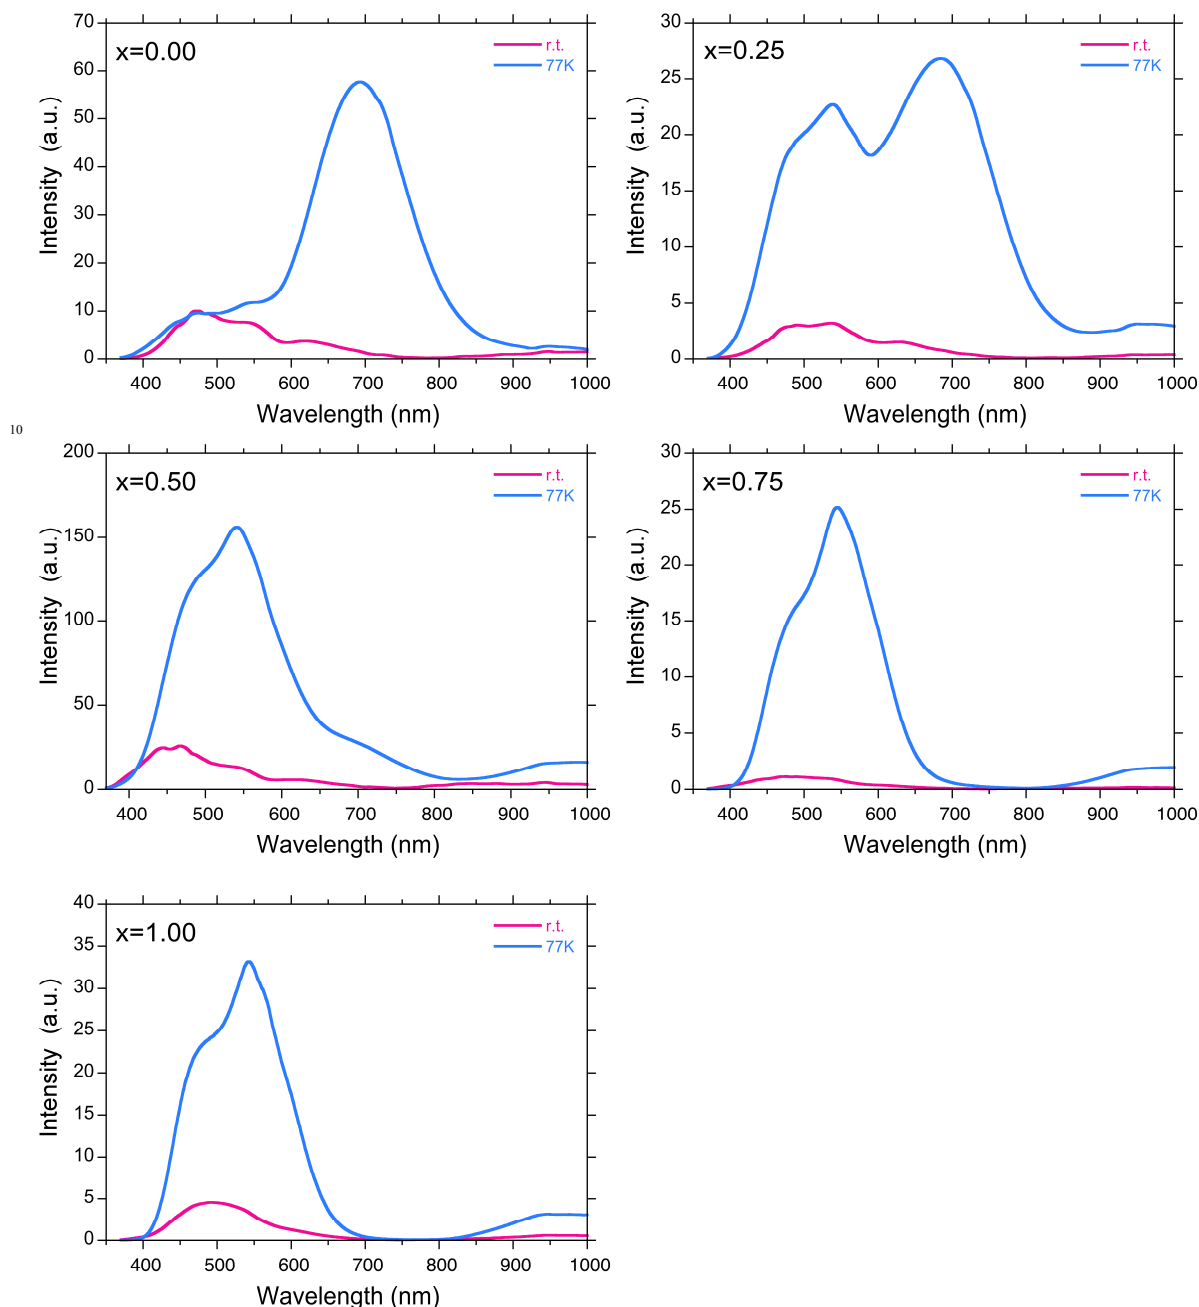

10

**Figures S1.** PL spectra (excited at 360 nm) of thin films of SNP, GNP and SGNPs ( $x = 0.25, 0.50, 0.75$ ) in a vacuum at 77 K and room temperature. Weak, broad PL bands in the range of 800 and 1000 nm are due to the second order diffraction from the 500-nm PL band.

15

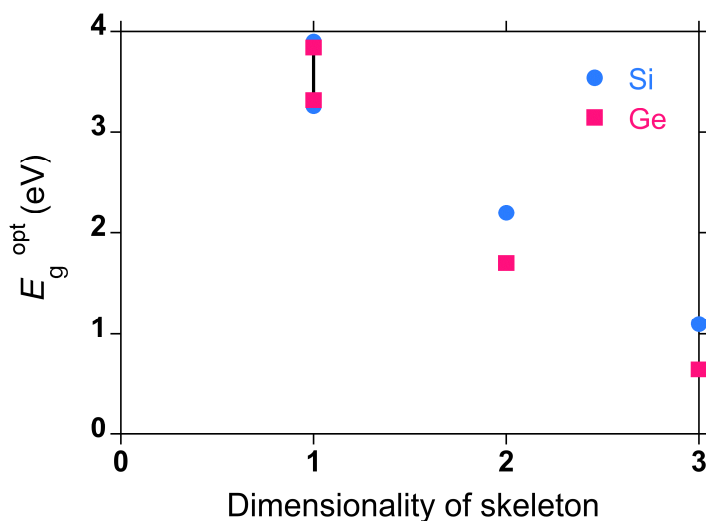

**Figures S2.** Optical band gap obtained from PL peak energy as a function of dimensionality Si and Ge. Data of 1D-Si and 1D-Ge were taken from (1) M. Fujiki, *Appl. Phys. Lett.*, 1994, **65**, 3251–3253 and (2) N. Ostapenko, N. Kozlova, S. Suto, M. Nanjo and K. Mochida, *Mol. Cryst. Liq. Cryst.*, 2008, **497**, 20–29, respectively.

5

**Table S1.** Synthetic condition of SNP, GNP and SGNPs.

| polymer  | 1, g | 2, g | Na, g | 12-crown-4, g | MCH, mL | $M_w^{a)}$ | $PDI = M_w/M_n^{a)}$ |
|----------|------|------|-------|---------------|---------|------------|----------------------|
| x = 1.00 | 5.0  | 0.0  | 2.3   | 0.091         | 20      | 10.5       | 3.1                  |
| x = 0.75 | 2.4  | 1.0  | 1.6   | 0.059         | 20      | 7.2        | 2.6                  |
| x = 0.50 | 1.0  | 0.8  | 0.8   | 0.029         | 20      | 3.5        | 1.4                  |
| x = 0.25 | 0.6  | 2.4  | 1.2   | 0.047         | 20      | 2.0        | 1.3                  |
| x = 0.00 | 0.0  | 2.5  | 1.0   | 0.037         | 20      | 1.9        | 1.3                  |

<sup>a)</sup> These values were based on a calibration of polystyrene standards.
